# Supplementary material
Source: Springer Nature journal article supplement (https://www.springermedizin.de/resource/supplementary/12875_2013_919_MOESM1_ESM.pdf/9435396)
Supplement: MOESM1 [file 9435396]

56,301 visits made to the practice during the study period

12,520 with a visit in the previous 30 days

9716 not between 18 and 64

7559 with coded chronic lung disease

24,677 with no mention of cough

609 with cough lasting > 21 days

98 with uncoded chronic lung disease

10 with immunosuppression

90 missing visit notes in electronic health record

60 without cough-related diagnosis

962 cough-related visits analyzed
